# Supplementary material for: Dimethylglycine Can Enhance the Cryopreservation of Red Blood Cells by Reducing Ice Formation and Oxidative Damage
Source: MDPI journal article supplement (doi:10.3390/ijms24076696), 2023-04-03
Supplement: s1 [file s1]

## Article

# Dimethylglycine Can Enhance the Cryopreservation of Red Blood Cells by Reducing Ice Formation and Oxidative Damage

Yuying Hu <sup>1,†</sup>, Xiangjian Liu <sup>1,†</sup>, Marlene Davis Ekpo <sup>1</sup>, Jiangming Chen <sup>1</sup>, Xiaoxiao Chen <sup>1</sup>, Wenqian Zhang <sup>1</sup>, Rui Zhao <sup>1</sup>, Jingxian Xie <sup>1</sup>, Yongju He <sup>2</sup> and Songwen Tan <sup>1,\*</sup>

<sup>1</sup> Xiangya School of Pharmaceutical Sciences, Central South University, Changsha 410013, China

<sup>2</sup> School of Materials Science and Engineering, Central South University, Changsha 410013, China

## Experimental Section

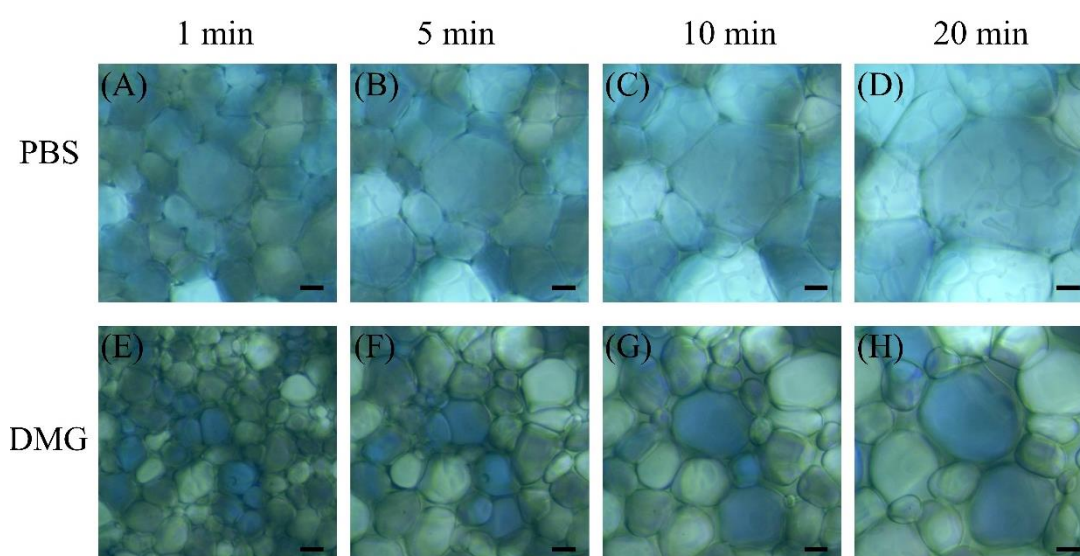

**Figure S1.** Ice recrystallization inhibition assays. Additional cryomicroscopic images of PBS at different time highlighting ice crystal growth were shown in (A) 1 min, (B) 5 min, (C) 10 min, and (D) 20 min. The representative images of ice crystals of DMG at different time were shown in (E) 1 min, (F) 5 min, (G) 10 min, and (H) 20 min. The concentration of DMG was 4%. Scale bar = 10  $\mu$ m.

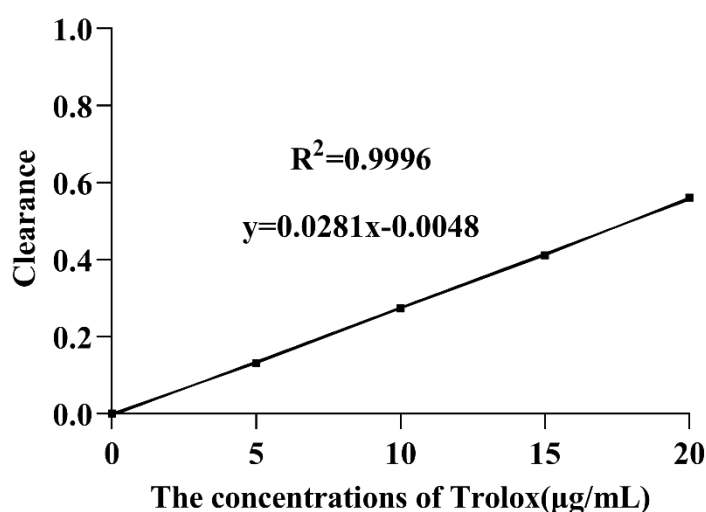

**Figure S2.** The standard curve of clearance and concentrations of Trolox.
